# Supplementary material for: Association of the CTLA4 Gene with Graves' Disease in the Chinese Han Population
Source: PubMed Central journal article supplement (PMC2843719; doi:10.1371/journal.pone.0009821), 2010-03-23
Supplement: pone.0009821.s001.pdf [file pone.0009821.s001.pdf]

**Table S1** 47 SNPs selected in CTLA4 gene region from the NCBI dbSNP and quality control filters

| SNP                     | Description  | Allele                |
|-------------------------|--------------|-----------------------|
| rs35832561 <sup>1</sup> | 5' near gene | G                     |
| <b>rs11571315</b>       | 5' near gene | <b>A/G</b>            |
| <b>rs4553808</b>        | 5' near gene | <b>A/G, -1661</b>     |
| <b>rs11571316</b>       | 5' near gene | <b>C/T</b>            |
| rs231772 <sup>1</sup>   | 5' near gene | G                     |
| rs231773 <sup>1</sup>   | 5' near gene | A                     |
| rs11571317 <sup>1</sup> | 5' near gene | C                     |
| rs2317741 <sup>1</sup>  | 5' near gene | A                     |
| rs5742909 <sup>3</sup>  | 5' near gene | C/T, -318             |
| <b>rs231775</b>         | exon_1       | <b>A/G, +49G&gt;A</b> |
| rs231776 <sup>1</sup>   | intron_1     | G                     |
| <b>rs231777</b>         | intron_1     | <b>C/T</b>            |
| rs231778 <sup>1</sup>   | intron_1     | A                     |
| <b>rs35219727</b>       | intron_1     | <b>A/G</b>            |
| <b>rs231779</b>         | intron_1     | <b>C/T</b>            |
| rs35703452 <sup>1</sup> | intron_1     | DEL                   |
| rs1065442 <sup>1</sup>  | exon_2       | T                     |
| rs41265959 <sup>1</sup> | intron_2     | T                     |
| rs41265961 <sup>2</sup> | intron_2     | G/A                   |
| rs231780 <sup>1</sup>   | intron_2     | A                     |
| rs11571324 <sup>1</sup> | intron_2     | G                     |
| rs34162447 <sup>3</sup> | exon_3       | A/G                   |
| rs13384548 <sup>1</sup> | exon_3       | G                     |
| rs35411154 <sup>1</sup> | exon_3       | G                     |
| rs231721 <sup>1</sup>   | 3' near gene | T                     |
| rs3087243 <sup>3</sup>  | 3' near gene | A/G, CT60             |
| rs231722 <sup>1</sup>   | 3' near gene | T                     |
| <b>rs231723</b>         | 3' near gene | <b>A/G</b>            |
| rs35902238 <sup>1</sup> | 3' near gene | DEL                   |
| <b>rs10197010</b>       | 3' near gene | <b>A/C</b>            |
| rs3087245 <sup>2</sup>  | 3' near gene | C/T                   |
| <b>rs231725</b>         | 3' near gene | <b>A/G</b>            |
| rs34227960 <sup>1</sup> | 3' near gene | DEL                   |
| rs231726 <sup>3</sup>   | 3' near gene | <b>C/T</b>            |
| rs10932024 <sup>1</sup> | 3' near gene | T                     |
| rs3087246 <sup>3</sup>  | 3' near gene | C/T                   |
| rs231727 <sup>3</sup>   | 3' near gene | A/G                   |
| <b>rs11571302</b>       | 3' near gene | <b>C/A, JO31</b>      |
| rs35541017 <sup>1</sup> | 3' near gene | DEL                   |
| rs35720565 <sup>1</sup> | 3' near gene | C                     |
| rs7565213 <sup>2</sup>  | 3' near gene | A/G, JO30             |
| <b>rs231729</b>         | 3' near gene | <b>A/T</b>            |
| <b>rs231730</b>         | 3' near gene | <b>T/A</b>            |
| rs5837885 <sup>1</sup>  | 3' near gene | DEL                   |
| <b>rs231731</b>         | 3' near gene | <b>C/T</b>            |
| <b>rs10932025</b>       | 3' near gene | <b>G/C</b>            |
| rs11571297 <sup>3</sup> | 3' near gene | A/G, JO27             |

Note: <sup>1, 2, 3</sup> showed the SNPs loci were removed from the analysis respectively because of MAF <1%, missing data above 20% and Hardy-Weinberg Equilibrium (HWE)  $p \leq 1 \times 10^{-6}$  in controls.
